# Supplementary material
Source: PubMed Central journal article supplement (PMC9648057)
Supplement: NIHMS1843639-supplement-Supplementary_Table_1.pdf [file NIHMS1843639-supplement-Supplementary_Table_1.pdf]

**Supplementary Table 1: Filtered variants for affected members of RDHM-05**

| Chr | Start     | Ref | Alt | Gene name     | Amino acid change           | 1000G_ALL | REVEL  | ClinPred | Comment                                               |
|-----|-----------|-----|-----|---------------|-----------------------------|-----------|--------|----------|-------------------------------------------------------|
| 1   | 145532549 | T   | C   | <i>ITGA10</i> | p.(Phe 191Phe)              | .         | .      | .        | Synonymous SNV                                        |
| 2   | 109381202 | A   | G   | <i>RANBP2</i> | p. (Asn1403 Asp)            | .         | 0.033  | 0.02     | Not conserved                                         |
| 2   | 109545803 | G   | A   | <i>EDAR</i>   | p.( Tyr 69 Tyr)             | 0.0014    | 0.0014 | 0.001    | Synonymous SNV                                        |
| 8   | 8185918   | C   | T   | <i>PRAG1</i>  | p.(Val792Ile)               | 0.0016    | 0.172  | 0.058    | Not conserved, 2 homozygous reported in ExAC          |
| 8   | 10469039  | G   | A   | <i>RP1L1</i>  | p.( Pro 857 Ser)            | .         | 0.085  | 0.615    | Not conserved                                         |
| 8   | 12947891  | T   | C   | <i>DLC1</i>   | p. (Asn 804Ser)             | .         | 0.015  | 0.019    | Not conserved, very low REVEL and ClinPred scores     |
| 10  | 47000004  | T   | C   | <i>GPRIN2</i> | p.(Val375Ala)               | .         | 0.042  | 0.002    | Not conserved, not present in region of homozygosity  |
| 10  | 47087680  | C   | T   | <i>NPY4R</i>  | p. (His 299 His)            | .         | .      | .        | Synonymous SNV                                        |
| 10  | 47087731  | C   | T   | <i>NPY4R</i>  | p. (Cys 316 Cys)            | .         | .      | .        | Synonymous SNV                                        |
| 14  | 20482735  | -   | CTT | <i>OR4K14</i> | p.( Leu 206_Leu 207ins Arg) | .         | .      | .        | Non-frameshift insertion, Olfactory receptor          |
| 14  | 20766966  | T   | C   | <i>TTC5</i>   | p.(Tyr210Cys)               | .         | 0.828  | 0.99     | Conserved, High Revel and ClinPred scores, Segregates |
| 21  | 10920098  | T   | C   | <i>TPTE</i>   | p. (Lys 248Glu)             | .         | 0.329  | 0.009    | Not conserved, not present in region of homozygosity  |

Chr, chromosome; Ref, reference; Alt, alternative; 1000G-ALL, 1000 genomes allele frequency; REVEL and ClinPred
