# Supplementary material
Source: PubMed Central journal article supplement (PMC9648057)
Supplement: NIHMS1843639-supplement-Supplementary_Table_2.pdf [file NIHMS1843639-supplement-Supplementary_Table_2.pdf]

**Supplementary Table 2. Identical by decent (IBD) mapping of exome variants in families 5377 and 5543 from Egypt identified a shared haplotype (orange) on Chromosome 14: 20295764 – 26596857, containing the deleterious TTC5 variant (bold font).**

| Chr       | Position        | dbSNP              | Ref                  | Family 5377-A |            | Family 5543-A |
|-----------|-----------------|--------------------|----------------------|---------------|------------|---------------|
|           |                 |                    |                      | Alt           | Genotype   | Genotype      |
| 14        | 20060200        | rs1959630          | G                    | T             | Hom        | Hom           |
| 14        | 20060203        | rs1958717          | A                    | G             | Hom        | Hom           |
| 14        | 20060289        | rs112192573        | TCATAGATTTGCTCACTGAC | T             | Hom        | Hom           |
| 14        | 20060346        | rs2775253          | T                    | A             | Hom        | Hom           |
| 14        | 20060369        | rs2775254          | G                    | A             | Hom        | Hom           |
| 14        | 20060860        | rs1959629          | C                    | T             | Hom        | Hom           |
| 14        | 20060884        | rs1959628          | C                    | G             | Hom        | Hom           |
| 14        | 20118273        | rs9323534          | C                    | T             | Het        | Hom           |
| 14        | 20197631        | rs4981822          | T                    | A             | Het        | Hom           |
| 14        | 20197681        | rs4981088          | G                    | A             | Het        | Hom           |
| 14        | 20197728        | rs4981823          | G                    | C             | Hom        | Hom           |
| 14        | 20224415        | rs17277221         | T                    | C             | Het        | NC            |
| 14        | 20224484        | rs17277228         | T                    | C             | Het        | NC            |
| <b>14</b> | <b>20295764</b> | <b>rs199831317</b> | <b>G</b>             | <b>A</b>      | <b>Hom</b> | <b>Hom</b>    |
| 14        | 20296426        | rs1953552          | A                    | C             | Hom        | Hom           |
| 14        | 20301877        | rs3742945          | T                    | C             | Hom        | Hom           |
| 14        | 20356022        | rs3093930          | T                    | C             | Hom        | Hom           |
| 14        | 20386575        | rs945011           | A                    | G             | Hom        | Hom           |
| 14        | 20435190        | rs1713408          | T                    | C             | Hom        | Hom           |
| 14        | 20456995        | rs1130409          | T                    | G             | Hom        | Hom           |
| 14        | 20558614        | rs891297           | C                    | T             | Hom        | Hom           |
| 14        | 20641011        | rs11628297         | T                    | A             | Hom        | Hom           |
| 14        | 20641119        | rs11627438         | A                    | T             | Hom        | Hom           |
| 14        | 20641226        | rs11622969         | C                    | T             | Hom        | Hom           |
| 14        | 20641512        | rs11627574         | A                    | G             | Hom        | Hom           |
| 14        | 20641567        | rs11622794         | G                    | A             | Hom        | Hom           |
| 14        | 20989972        | rs2741733          | G                    | A             | Hom        | Hom           |
| 14        | 21017978        | rs1243445          | G                    | C             | Hom        | Hom           |
| 14        | 21057920        | rs12437266         | C                    | T             | Hom        | Hom           |
| 14        | 21155131        | rs7145814          | T                    | C             | Hom        | Hom           |
| 14        | 21155489        | rs7161544          | G                    | A             | Hom        | Hom           |
| 14        | 21155677        | rs4982419          | G                    | A             | Hom        | Hom           |
| 14        | 21302571        | rs6571751          | A                    | G             | Hom        | Hom           |

|    |          |             |   |          |     |     |
|----|----------|-------------|---|----------|-----|-----|
| 14 | 21328625 | rs3748361   | G | C        | Hom | Hom |
| 14 | 21360970 | rs3762158   | C | G        | Hom | Hom |
| 14 | 21362893 | rs10138699  | T | C        | Hom | Hom |
| 14 | 21403494 | rs8022395   | C | T        | Hom | Hom |
| 14 | 21492657 | rs1060722   | T | C        | Hom | Hom |
| 14 | 21492810 | rs7617      | G | A        | Hom | Hom |
| 14 | 21570528 | rs17792778  | T | C        | Hom | Hom |
| 14 | 22767315 | rs8572      | C | T        | Hom | Hom |
| 14 | 22771119 | rs8786      | T | A        | Hom | Hom |
| 14 | 22771504 | rs148216086 | T | TA<br>GC | Hom | Hom |
| 14 | 22773619 | rs1061040   | T | C        | Hom | Hom |
| 14 | 22812901 | rs8018462   | A | G        | Hom | Hom |
| 14 | 22813240 | rs1805059   | C | T        | Hom | Hom |
| 14 | 22830077 | rs4982685   | T | C        | Hom | Hom |
| 14 | 22836839 | rs1042703   | C | T        | Hom | Hom |
| 14 | 22902571 | rs1242631   | T | C        | Hom | Hom |
| 14 | 22903704 | rs12437151  | G | A        | Hom | Hom |
| 14 | 22905226 | rs2295680   | G | A        | Hom | Hom |
| 14 | 22905653 | rs2295682   | C | T        | Hom | Hom |
| 14 | 23080170 | rs941719    | C | G        | Hom | Hom |
| 14 | 23308165 | rs910332    | A | G        | Hom | Hom |
| 14 | 23309489 | rs1950252   | A | G        | Hom | Hom |
| 14 | 23310425 | rs1535094   | C | G        | Hom | Hom |
| 14 | 23433544 | rs2069540   | G | A        | Hom | Hom |
| 14 | 24060681 | rs1951635   | A | G        | Hom | Hom |
| 14 | 24076166 | rs2070341   | C | T        | Hom | Hom |
| 14 | 24302050 | rs4247001   | T | C        | Hom | Hom |
| 14 | 24321930 | rs4981504   | A | G        | Hom | Hom |
| 14 | 24369009 | rs10151147  | T | C        | Hom | Hom |
| 14 | 24376635 | rs7149586   | T | C        | Hom | Hom |
| 14 | 24377551 | rs2243891   | A | G        | Hom | Hom |
| 14 | 24429988 | rs10146759  | C | T        | Hom | Hom |
| 14 | 24432070 | rs7151995   | G | T        | Hom | Hom |
| 14 | 24440156 | rs1043831   | T | C        | Hom | Hom |
| 14 | 24440269 | rs3211056   | C | G        | Hom | Hom |
| 14 | 24441767 | rs11625819  | T | G        | Hom | Hom |
| 14 | 24441768 | rs11625820  | T | A        | Hom | Hom |
| 14 | 24506229 | rs5249      | G | T        | Hom | Hom |

|    |          |                       |        |   |     |     |
|----|----------|-----------------------|--------|---|-----|-----|
| 14 | 24632954 | rs8192917             | C      | T | Hom | Hom |
| 14 | 26596857 | rs4983176             | G      | A | Hom | Hom |
| 14 | 26597707 | .                     | AAAG   | A | NC  | Het |
| 14 | 29597723 | rs2230505             | A      | G | Hom | NC  |
| 14 | 29638532 | rs2273807             | C      | T | Hom | NC  |
| 14 | 30630532 | rs229150              | A      | G | Hom | NC  |
| 14 | 30890501 | rs72262576;rs10562264 | GGTAAA | G | Hom | NC  |
| 14 | 31113320 | rs2273483             | T      | C | Hom | NC  |
| 14 | 31178035 | rs2274201             | G      | A | Hom | NC  |
| 14 | 31295920 | rs61741258            | T      | C | Hom | NC  |
| 14 | 31296055 | rs61744248            | T      | C | Hom | NC  |
| 14 | 31321680 | rs28396248            | T      | G | NC  | Hom |
| 14 | 31349841 | rs3736918             | C      | T | Hom | NC  |
| 14 | 31350707 | rs7158257             | A      | G | Hom | NC  |

Chr, chromosome; Ref, reference; Alt, alternative; Hom, homozygous; Het, heterozygous.
